# Supplementary material
Source: Springer Nature journal article supplement (https://www.springermedizin.de/resource/supplementary/12931_2013_1449_MOESM3_ESM.pdf/9426010)

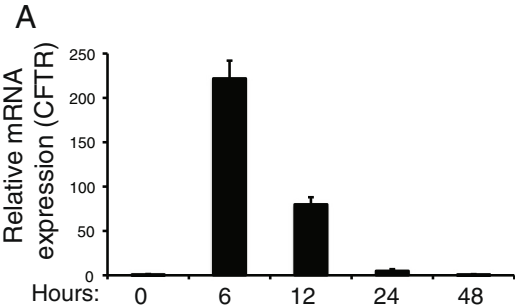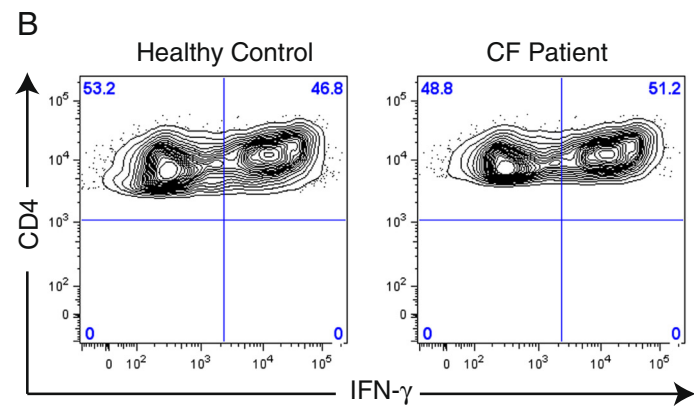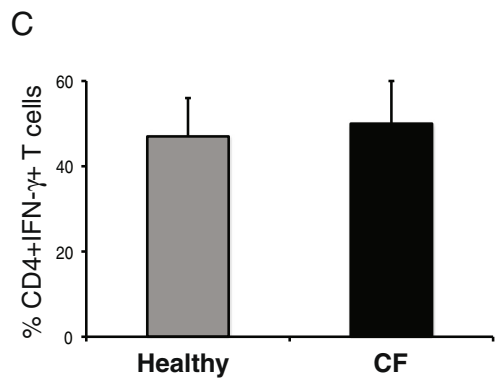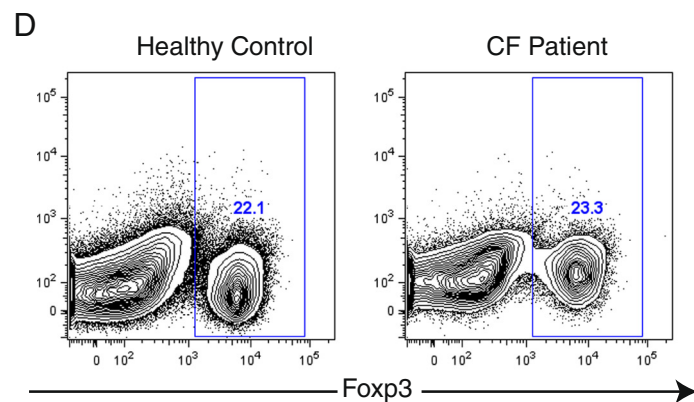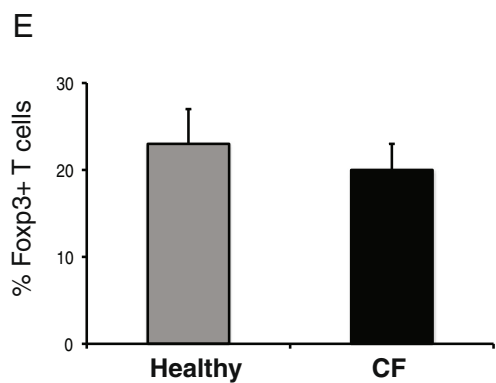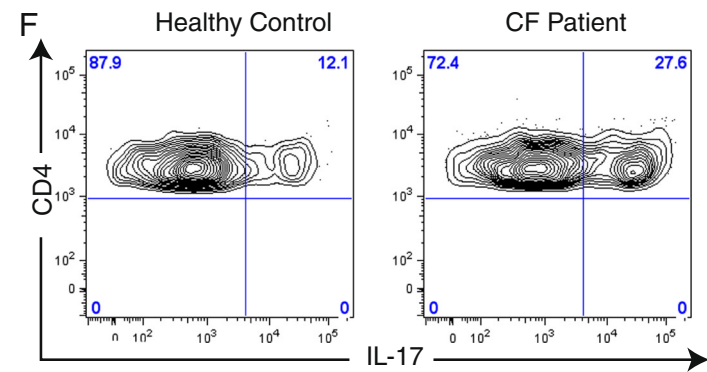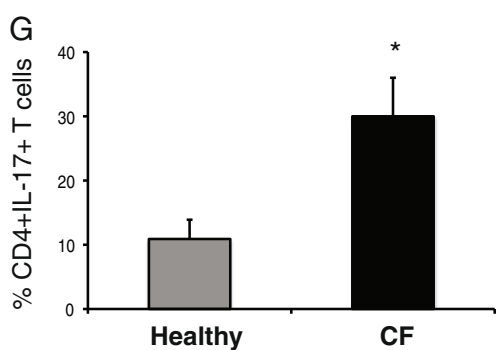

Supplement: MOESM3 [file 9426010]
